## 20 **Abstract**

21 Neuroticism has been described as a broad and pervasive personality dimension or  
22 ‘heterogeneous’ trait measuring components of mood instability, such as worry; anxiety;  
23 irritability; moodiness; self-consciousness and sadness. Consistent with depression and  
24 anxiety-related disorders, increased neuroticism places an individual vulnerable for other  
25 unipolar and bipolar mood disorders and therefore highly relevant in epidemiologic research.  
26 However, the measurement of neuroticism remains a challenge. We aimed to adapt the 12-  
27 item Eysenck Personality Questionnaire-Revised Neuroticism (EPQ-RN) scale for use in  
28 epidemiologic studies by identifying psychometrically efficient items using item response  
29 theory. The 12-item EPQ-RN scale was evaluated by estimating an IRT model on data from  
30 401,527 UK Biobank participants aged 39 to 73 years ( $M = 56.41$  years;  $SD = 8.06$ ), 53.68%  
31 female. The IRT model yielded two item characteristics: item discrimination, an indicator of  
32 how well an item differentiates between respondents, and item difficulty, an indicator of the  
33 amount of the latent construct (neuroticism) needed to endorse an item. The EPQ-RN  
34 exhibited psychometric inefficiency with poor discrimination at extremes of the scale range.  
35 High and low scores are relatively poorly represented and uninformative suggesting that high  
36 neuroticism scores derived from the scale are a function of cumulative mid-range values.  
37 Following systematic item deletion, a 3-item scale was found to have high levels of  
38 discrimination, but offered a narrow range of difficulty i.e. was not sensitive to low levels of  
39 neuroticism. A 7-item scale was found to be most informative; providing high levels of  
40 discrimination across the range of neuroticism scores.

41

## 42 **Introduction**

43           Neuroticism has been operationally defined as a personality trait assessed by items  
44           referencing to instances of worry; anxiety; irritability; moodiness; self-consciousness; and  
45           sadness [1-3]. The NEO-PI (Neuroticism-Extraversion-Openness Personality Inventory)  
46           operationalises neuroticism as a combination of individual behavioural traits which may also  
47           be measured as isolated components of mood state e.g., anxiety; hostility; depression; self-  
48           consciousness; impulsiveness and vulnerability [4]. Eysenck has further argued that  
49           neuroticism is a direct reaction to the autonomic nervous system [5, 6], findings supported  
50           increased neuroticism correlated with tolerance to a highly stressed environment, suggesting  
51           a habituation relationship with everyday stressors [7, 8].

52           Eysenck's attempts to define neuroticism and evaluate the measurement items thereof  
53           resulted in an original version of the Eysenck neuroticism scale existing as a component of  
54           the Maudsley Medical Questionnaire [9]. Assessment outcomes of this scale were reported in  
55           the Manual for the Maudsley Personality Inventory (MPI) [10]. Revision of the MPI by  
56           removing several items, and by using clinical judgement and factor analysis, has resulted in a  
57           revised neuroticism scale as a component of the Eysenck Personality Questionnaire [11],  
58           which has become a gold standard for neuroticism assessment and is therefore widely used in  
59           epidemiological research and cohort studies.

60           Using correlational techniques commonly used in classical test theory (CTT) for item  
61           deletion, has a bias towards identifying closely associated items as being informative.  
62           However, it is relatively opaque to the informativeness of individual items. The EPQ-R  
63           neuroticism scale (EPQ-RN), for example, has been found to lack items identifying  
64           respondents who would normally endorse items at the extreme ends of the trait continuum,  
65           e.g. high vs. low neuroticism [12].

66 We investigated the psychometric efficiency of the 12-item EPQ-RN [11] as a widely  
67 used measurement of neuroticism. We applied item response theory (IRT) to  
68 psychometrically evaluate the EPQ-RN using data from UK Biobank [13], a large population  
69 study which assessed neuroticism at baseline. Our expectation was that the large sample size  
70 and its heterogeneous population base would provide valuable item-level information for  
71 assessing the informativeness of individual items and the overall psychometric reliability of  
72 the scale.

## 73 **Methods**

### 74 **Design and sample**

75 We conducted a cross-sectional analysis of all UK Biobank participants providing  
76 EPQ-RN data during the baseline assessment. UK Biobank is a large population-based  
77 prospective cohort study of >500k participants [13]. Further details on design and procedure,  
78 including ethical approval, have been previously reported by Sudlow et al. [13].

### 79 **Assessment**

80 The selection of mental health assessments was completed on a touchscreen  
81 computer, including the 12-item EPQ-RN [11] where participants were required to answer,  
82 ‘yes’, ‘no’, ‘I don’t know’ or ‘I do not wish to answer’ in response to the 12 questions: ‘Does  
83 your mood often go up and down?’, ‘Do you ever feel just miserable for no reason?’, ‘Are  
84 you an irritable person?’, ‘Are your feelings easily hurt?’, ‘Do you often feel fed-up?’,  
85 ‘Would you call yourself a nervous person?’, ‘Are you a worrier?’, ‘Would you call yourself  
86 tense or highly strung?’, ‘Do you worry too long after an embarrassing experience?’, ‘Do you  
87 suffer from nerves?’, ‘Do you often feel lonely?’, ‘Are you often troubled by feelings of

88 guilt?'. The responses 'I don't know' and 'I do not wish to answer' were recoded to missing  
89 data because they do not provide any information on the latent trait of neuroticism.

## 90 **Analytic strategy**

91 An item-response theory (IRT) model was used to investigate item characteristics.  
92 Details of the IRT model are specified in the supporting information. In brief, the IRT model  
93 describes how items contribute to the assessment of a latent trait, such as neuroticism. This  
94 parameter is by convention called  $\theta$  and is standardised to a mean value of zero and a range  
95 of -4 to +4 standard deviation units. For each item, a difficulty parameter ( $\alpha$ ) identifies which  
96 level of  $\theta$  the item most efficiently describes. For example, in the EPQ-RN which items are  
97 most likely to be endorsed as "Yes" by individuals with high neuroticism.

98 Also, for each item, a discrimination parameter ( $\beta$ ) describes how well each item  
99 discriminates between different levels of  $\theta$ . For example, in the EPQ-RN, is an item scored  
100 "Yes" only by those with high neuroticism, or also by those with moderate levels of  
101 neuroticism. Difficulty is measured as the point of inflection of a logistic regression curve  
102 between "Yes" and "No scores where high scores reflect greater difficulty. Discrimination is  
103 estimated as the slope of the inflection point between "Yes" and "No scores, where higher  
104 values of  $\beta$  reflect greater discrimination. Difficulty and discrimination parameters are used  
105 to select items that collectively have high levels of discrimination across a range of  $\theta$  values,  
106 rather than clustering around a single value [14].

107 The scalability of items, i.e. the extent to which they provide a unidimensional  
108 monotonic scale was assessed by Mokken analysis, where high values of Loevinger's H  
109 between 0.5 and 1 suggest high scalability.

110 To explore the potential for improving the psychometric properties of the EPQ-RN, a  
111 backwards stepwise approach to item removal was adopted. The goal was to identify items  
112 covering a broad range of difficulty, with high levels of discrimination, and high scalability  
113 scores.

114 UK Biobank data for this analysis (application 15697) were uploaded onto the  
115 Dementias Platform UK (DPUK) Data Portal [15] and analysed using STATA 17.0 [16].

## 116 **Results**

### 117 **Sample**

118 The entire UK Biobank sample available after withdrawals and with complete EPQ-  
119 RN data was included in the analysis ( $n = 401,527$ ). Participants were aged 39 to 73 years ( $M$   
120  $= 56.41$  years;  $SD = 8.07$ , 53.68% female).

### 121 **IRT analysis**

122 For the 12-item scale, difficulty ranged between  $\alpha = -0.14$  and  $\alpha = 1.41$ . with 6 items  
123 clustering between 0 and 1 (Table 1). These findings can be visualised using item  
124 characteristic curves and item information functions (Fig 1). Both plots show the EPQ-RN to  
125 be moderately efficient for measuring the middle range of neuroticism, and that high scores  
126 are a cumulation of middle range item scores, rather than items which are sensitive to high  
127 (or low) levels of neuroticism. This suggests a degree of measurement duplication.

128

129 **Fig 1. Item Characteristic Curves (ICC) and Item Information Function (IIF) graph for**  
130 **the 12-item scale.**

131

132 **Table 1. IRT model item parameters for the 12-item scale.**

133

134 Discrimination parameters ranged between  $\beta = 1.34$  and  $\beta = 2.28$ . The item  
135 measuring ‘Does your mood often go up and down?’ exhibits the highest level of  
136 discrimination at 2.28, suggesting that this ‘mood’ question possesses the highest amount of  
137 information synonymous with the neurotic trait. In contrast, the item ‘Are you an irritable  
138 person?’, 1.34, is the lowest, and below the recommended level of 1.7 for measuring trait  
139 values [14]. The items, ‘Are you a worrier?’, ‘Do you ever feel just miserable for no  
140 reason?’, ‘Do you often feel fed-up?’ and ‘Would you call yourself tense or highly strung’  
141 and ‘Would you call yourself a nervous person?’ had discrimination values of above 1.7.

142 For scalability, the monotonicity parameter, Loevinger’s H, ranged between 0.35 and  
143 0.47 with four items scoring  $< 0.4$ , indicating poor scalability. This combination of a limited  
144  $\alpha$  range, modest  $\beta$  scores, and relatively low H values describes a relatively inefficient  
145 instrument. This is confirmed by poor goodness of fit (RMSEA = 0.11).

146 The potential for improving the psychometric properties of the EPQ-RN was limited  
147 by the relatively narrow range of item difficulty scores; there being no items particularly  
148 sensitive to high or low levels of neuroticism (Fig 1). This constrained our item selection  
149 strategy to identifying least discriminating items, and omitting items with identical difficulty  
150 scores according to scalability and goodness of fit. In order of removal, omitted items were  
151 ‘Are you an irritable person?’ ( $\beta = 1.34$ ), ‘Do you often feel lonely?’ ( $\beta = 1.49$ ), ‘Are you  
152 often troubled by feelings of guilt?’ ( $\beta = 1.54$ ), ‘Do you worry too long after an embarrassing  
153 experience?’ ( $\beta = 1.45$ ), and ‘Are your feelings easily hurt?’ ( $\beta = 1.43$ ). For the remaining  
154 seven items the discrimination scores ranged between 1.57 and 2.57, the difficulty score  
155 ranged between  $\alpha = -0.15$  and  $\alpha = 1.25$ , with all items showing moderate to good scalability  
156 with H values 0.47 to 0.51 (Table 2). However, the 7-item scale did not show an improved

157 goodness of fit (RMSEA = 0.17). ICC and IIF plots for the 7-item scale can be found in S1  
158 Fig.

159 To explore further efficiencies the item elimination process was continued until there  
160 were 3 remaining items, each with non-duplicative difficulty scores, high discrimination  
161 scores and high scalability scores (Table 2). Goodness of fit for the 3-item scale was high  
162 (RMSEA = 0.00). ICC and IIF plots for the 3-item scale can be found in S2 Fig.

163

164 **Table 2. IRT model item parameters for the 7-item and 3-item scales.**

165

166 An important issue is the comparability of assessment between the 12, 7 and 3 item  
167 scales. To assess this estimated  $\theta$  scores for each individual were calculated and ranked for  
168 each scale. The intraclass correlation rank correlation between the 12-item and 7 item scale  
169 was  $r = 0.95$ , indicating 90.25% agreement between scales. Between the 12-item and 3-item  
170 scales the correlation was  $r = 0.84$ , whilst between the 7 item and 3-item scales  $r = 0.91$ .

171 The reliability of the scale and statistical assumptions of the IRT models are reported  
172 in the supporting information.

173 In summary, the overall pattern of item distribution across the  $\theta$  continuum suggests  
174 that across the 12-item EPQ-RN neuroticism scale there are no items which measure an  
175 extreme level of neurotic trait characteristics or an extreme level of non-neurotic trait  
176 characteristics. It suggests that the questions are mostly measuring the neurotic trait  
177 characteristics which have a higher probability of endorsement by individuals who are  
178 experiencing a minimal to no level of neuroticism ( $\theta = -0.13$  to 1.41).

179



## 180 Discussion

181 In a large population cohort of 401,527 adults aged 39-73 years, limitations in the  
182 range and reliability of item trait characteristics were found across the 12-item EPQ-RN scale  
183 when an IRT model was estimated. Our findings suggest that the 12-item scale is inefficient  
184 with poor discrimination and scalability at the extreme ends of the scale range, such that high  
185 and low trait levels are poorly assessed. A reliability function analysis suggests there is poor  
186 reliability at the extremes of the scale score and high neuroticism scores derived from the  
187 EPQ-RN are a function of accumulative mid-range values. Through systematic item deletion  
188 and mathematical assessment, a revised 7-item version of the scale with greater item  
189 discrimination and reliability was found, suggesting that selective items within the 12-item  
190 version are redundant. A further reduced 3-item version was investigated but although this  
191 scale possesses items of high discrimination and scalability, item range is very narrow ( $\alpha =$   
192 0.19 - 0.33) and lacks reliability.

193 To our knowledge, this is the first study to conduct a comprehensive psychometric  
194 scale assessment applying IRT to the EPQ-RN on such a large population. IRT has been  
195 successfully used to assess the item efficiency in psychiatric scales such as the 16-item  
196 Anxiety Sensitivity Index [17] and the 10-item feelings scale for depression [18] and it is  
197 increasingly being adopted to revise existing healthcare scales, such as the Simple Clinical  
198 Colitis Activity Index [19]. The reduction and choice of items however, is not a clearly  
199 defined process, notwithstanding the emergence of criteria for mathematical assumptions  
200 such as the 1.7 discrimination guidance [14] and Loewinger H criteria for scalability [20].  
201 These criteria are simultaneously taken into account with the estimated IRT model output,  
202 theoretical understanding of the construct of interest and scale application. For example, it  
203 might not be beneficial to have a short 3-item scale if all items are highly discriminatory

204 around the same value of  $\theta$  and no information is provided about patients or participants who  
205 lie along the rest of the  $\theta$  scale (-4 to +4). Reducing patient and participant burden needs to be  
206 weighed up against item reduction and, scale design and purpose.

207 Utilising psychometric methodologies to analyse psychosocial and health-related  
208 outcomes has important implications for analysing longitudinal change both in clinical  
209 settings and epidemiological research. An IRT analysis provides item-level information and  
210 scaling characteristics through the further computation of post-estimation assumptions  
211 including the estimation of an individual  $\theta$  latent metric predictive of individual  $\theta$  scores on  
212 the fitted IRT model. This  $\theta$  metric may then be used as a latent construct in assessing  
213 longitudinal change [21] which may be a more reliable measure compared to a single  
214 summated score [22]. Furthermore, it has also been suggested that using an IRT derived  $\theta$  in  
215 longitudinal studies, over the summated score, may be preferable with reducing  
216 overestimation of the repeated measure variance and underestimation of the between-person  
217 variance [23].

218 A further advantage of utilising psychometric methodologies in an epidemiological  
219 context is that IRT extends the opportunity to utilise, computer adaptive testing (CAT) for  
220 both scale development and for efficient test delivery. During CAT administration,  $\theta$  is  
221 automatically computed in response to the trait ( $\theta$ ) of the respondent and it is therefore not  
222 necessary to present the full range of items as the response scale is adaptive to individual  
223 performance (trait level), the items underlying the trait and a stopping rule [24]. The potential  
224 to reduce a scale so that only the most reliable and informative questions are presented to  
225 participants is essential in clinical settings and epidemiological research. This is important to  
226 consider when working with individuals who are older or who have co-comorbid psychiatric  
227 disorders. Moreover, focused, reliable and user-friendly scales in a research setting increase  
228 user satisfaction, reduce participant burden and maintain long-term participant retention.

229 Participants who display or possess the extreme trait characteristics are rare,  
230 however, the potential should exist for this eventuality, but many scales are simply not  
231 adequately designed to do so [21]. Moreover, previous research suggests that both the  
232 12 and 3-item EPQ-RN neuroticism scales may have reduced power to discriminate  
233 between low and high scoring individuals [12]; we found evidence of this in the 12-item  
234 scale. It is important in both clinical and research settings that scales are designed to  
235 measure across the trait spectrum and this is possible if scales are developed using  
236 psychometric methodologies such as those described here and elsewhere [25, 26].  
237 Future research and scale development should, therefore, develop a neuroticism scale  
238 that measures the entire latent trait continuum ( $\theta$ ) by also including items with high  
239 difficulty, i.e. items that only individuals with a high latent trait would endorse, and by  
240 also including items measuring the opposites of trait neuroticism, such as emotional  
241 stability. Further research is also needed to validate the 7-item EPQ-RN scale and to  
242 investigate its construct validity by comparing the scale to other established measures of  
243 neuroticism such as the NEO five-factor personality inventory neuroticism scale [27].

## 244 **Conclusions**

245 The 12-item neuroticism EPQ-R scale lacks item reliability and neurotic trait-specific  
246 information at the extreme ends of the neurotic continuum when an IRT model is estimated.  
247 A secondary analysis suggests that systematic item-elimination and re-estimation of the  
248 model produces a 7-item scale with higher levels of item information and reliability. This  
249 study suggests that the 12-item EPQ-R scale could benefit from item revisions and updating  
250 including item deletions. Strengths of this study were the large population cohort available  
251 for a comprehensive IRT analysis and the psychometric methodologies which were applied to  
252 the data.

## 253 **Acknowledgements**

254 All analyses were conducted on the Dementias Platform (DPUK) Data Portal using  
255 UK Biobank application 15697 PI John Gallacher for DPUK project 0169. The Medical  
256 Research Council supports DPUK through grant MR/T0333771. Sarah Bauermeister and  
257 Patrick Pflanz are supported by DPUK. Access to the data can be requested through UK  
258 Biobank (<https://www.ukbiobank.ac.uk/enable-your-research/apply-for-access>).

## 259 **Declarations**

### 260 **Financial Disclosure Statement**

261 The Medical Research Council supports DPUK through grant MR/T0333771

### 262 **Competing interests**

263 SB, CPP and JG declare no competing interests

### 264 **Ethics approval and consent to participate**

265 Analysis of secondary data only with ethical approval in place from source cohort, UK  
266 Biobank Research Ethics Committee - REC reference 11/NW/0382.

### 267 **Consent for publication**

268 SB, CPP and JG give full consent for publication

### 269 **Availability of data and materials**

270 The dataset(s) supporting the conclusions of this article is(are) available in the Dementias  
271 Platform UK (DPUK) Data Portal repository, <https://portal.dementiasplatform.uk/>.

### 272 **Authors' contributions**

273 SB and JG conceptualised the idea. CPP and SB analysed and interpreted the data, and wrote  
274 the manuscript. CPP and JG edited and proofread the manuscript. All authors read and  
275 approved the final manuscript.

## 276 **References**

- 277 1. Costa PT, Jr., McCrae RR. Influence of extraversion and neuroticism on subjective  
278 well-being: happy and unhappy people. *J Pers Soc Psychol.* 1980;38(4):668-78. Epub  
279 1980/04/01. PubMed PMID: 7381680.
- 280 2. Costa PT, Jr., McCrae RR. Four ways five factors are basic. *Personality and*  
281 *Individual Differences.* 1992;13(6):653-65.
- 282 3. Lahey BB. Public health significance of neuroticism. *Am Psychol.* 2009;64(4):241-  
283 56. Epub 2009/05/20. doi: 10.1037/a0015309. PubMed PMID: 19449983; PubMed Central  
284 PMCID: PMCPMC2792076.
- 285 4. Costa PT, Jr., McCrae RR. Neuroticism, somatic complaints, and disease: is the bark  
286 worse than the bite? *J Pers.* 1987;55(2):299-316. Epub 1987/06/01. PubMed PMID: 3612472.
- 287 5. Eysenck HJ. *The biological basis of personality.* London: Springfield, III: Charles C.  
288 Thomas; 1967.
- 289 6. Eysenck HJ. *Personality; biological foundation. the neurophysiology of individual*  
290 *difference.* New York: Academic Press; 1994.
- 291 7. Farrington D, Jolliffe D. *Personality and Crime.* In: N. J. Smelser PBB, editor.  
292 *International Encyclopedia of the Social & Behavioral Sciences.* 1st ed. USA: Elsevier; 2001.
- 293 8. LeBlanc J, Ducharme MB, Thompson M. Study on the correlation of the autonomic  
294 nervous system responses to a stressor of high discomfort with personality traits. *Physiol*  
295 *Behav.* 2004;82(4):647-52. Epub 2004/08/26. doi: 10.1016/j.physbeh.2004.05.014. PubMed  
296 PMID: 15327912.
- 297 9. Faulwasser H, Kittlaus H. [Economy of the Maudsley Medical Questionnaire  
298 (MMQ)]. *Psychiatr Neurol Med Psychol (Leipz).* 1973;25(5):276-81. Epub 1973/05/01.  
299 PubMed PMID: 4767115.

- 300 10. Eysenck HJ. Das "Maudsley Personality Inventory.". 1959.
- 301 11. Eysenck SB, Eysenck HJ, Barrett P. A revised version of the psychoticism scale.  
302 Personality and Individual Differences. 1985;6:21-9.
- 303 12. Birley AJ, Gillespie NA, Heath AC, Sullivan PF, Boomsma DI, Martin NG.  
304 Heritability and nineteen-year stability of long and short EPQ-R neuroticism scales.  
305 Personality and Individual Differences. 2006;40(4):737-47. doi: 10.1016/j.paid.2005.09.005.  
306 PubMed PMID: WOS:000236229500010.
- 307 13. Sudlow C, Gallacher J, Allen N, Beral V, Burton P, Danesh J, et al. UK Biobank: An  
308 Open Access Resource for Identifying the Causes of a Wide Range of Complex Diseases of  
309 Middle and Old Age. 2015;12(3). Epub March 31 2015. doi: 10.1371/journal.pmed.1001779.
- 310 14. Baker FB. The basics of item response theory. Original work published in 1985  
311 <http://echo.edres.org:8080/irt/baker/final.pdf>: College Park, DM: ERIC Clearinghouse on  
312 Assessment and Evaluation; 2001.
- 313 15. Bauermeister S, Orton C, Thompson S, Barker RA, Bauermeister JR, Ben-Shlomo Y,  
314 et al. Data Resource Profile: The Dementias Platform UK (DPUK) Data Portal. BioRxiv.  
315 Preprint. doi: 10.1101/582155.
- 316 16. StataCorp LLC. Stata 17.0. Stata Statistical Software College Station, Texas, United  
317 States: StataCorp LLC; 2021.
- 318 17. Zvolensky MJ, Strong D, Bernstein A, Vujanovic AA, Marshall EC. Evaluation of  
319 anxiety sensitivity among daily adult smokers using item response theory analysis. J Anxiety  
320 Disord. 2009;23(2):230-9. Epub 2008/08/30. doi: 10.1016/j.janxdis.2008.07.005. PubMed  
321 PMID: 18752924; PubMed Central PMCID: PMCPMC2655129.
- 322 18. Edelen MO, Reeve BB. Applying item response theory (IRT) modeling to  
323 questionnaire development, evaluation, and refinement. Qual Life Res. 2007;16 Suppl 1:5-18.  
324 Epub 2007/03/22. doi: 10.1007/s11136-007-9198-0. PubMed PMID: 17375372.

- 325 19. Walsh A, Cao R, Wong D, Kantschuster R, Matini L, Wilson J, et al. Using item  
326 response theory (IRT) to improve the efficiency of the Simple Clinical Colitis Activity Index  
327 (SCCAI) for patients with ulcerative colitis. *BMC Gastroenterol.* 2021;21(1):132. Epub  
328 2021/03/24. doi: 10.1186/s12876-021-01621-y. PubMed PMID: 33752610; PubMed Central  
329 PMCID: PMC7983213.
- 330 20. Crichton N. Information point Mokken Scale Analysis. *J Clin Nurs.* 1999;8(4):388.  
331 Epub 2000/07/25. PubMed PMID: 10905849.
- 332 21. Acock AC. *A Gentle Introduction to Stata.* 5th ed. Texax, USA: A Stata Press  
333 Publication; 2016.
- 334 22. Lu IRR. Embedding IRT in structural equation models: A comparison with regression  
335 based on IRT scores. *Structural Equation Modeling-a Multidisciplinary Journal.*  
336 2005;12(2):263-77. doi: DOI 10.1207/s15328007sem1202\_5. PubMed PMID:  
337 WOS:000228626500005.
- 338 23. Gorter R, Fox JP, Twisk JW. Why item response theory should be used for  
339 longitudinal questionnaire data analysis in medical research. *BMC Med Res Methodol.*  
340 2015;15:55. doi: 10.1186/s12874-015-0050-x. PubMed PMID: 26224012; PubMed Central  
341 PMCID: PMC4520067.
- 342 24. Wainer H, Dorans NJ, Flaugher R, Green BF, Mislevy RJ, Steinberg L, et al.  
343 *Computerized Adaptive Testing: A Primer.* 2nd ed. New York, USA: Routledge; 2014. 335 p.
- 344 25. de Ayala RJ. *The Theory and Practice of Item Response Theory.* USA: The Guildford  
345 Press; 2009.
- 346 26. Streiner DL, Norman GR, Cairney J. *Health Measurement Scales.* 5th ed. Great  
347 Britain: Oxford University Press; 2015.



- 348 27. McCrae RR, John OP. An introduction to the five-factor model and its applications. J  
349 Pers. 1992;60(2):175-215. Epub 1992/06/01. doi: 10.1111/j.1467-6494.1992.tb00970.x.  
350 PubMed PMID: 1635039.
- 351 28. Ferrando PJ. The measurement of neuroticism using MMQ, MPI, EPI and EPQ  
352 items:: a psychometric analysis based on item response theory. Personality and Individual  
353 Differences. 2001;30(4):641-56. doi: [https://doi.org/10.1016/S0191-8869\(00\)00062-3](https://doi.org/10.1016/S0191-8869(00)00062-3).
- 354 29. Yen WM. Scaling performance assessments: Strategies for managing local item  
355 dependence. Journal of Educational Measurement. 1993;30:187-213.
- 356 30. Sijtsma K, Molenaar IW. Introduction to nonparametric item response theory.  
357 London: Sage Publications; 2002.
- 358 31. Dorans N, Neal K. The effects of violations of unidimensionality on the estimation of  
359 item and ability parameters and on item response theory equating of the GRE Verbal Scale.  
360 Journal of Educational Measurement. 2005;22:249-62. doi: 10.1111/j.1745-  
361 3984.1985.tb01062.x.
- 362 32. Reckase M. Unifactor Latent Trait Models Applied to Multifactor Tests: Results and  
363 Implications. Journal of Educational and Behavioral Statistics - J EDUC BEHAV STAT.  
364 1979;4:207-30. doi: 10.3102/10769986004003207.
- 365 33. De Mars C. Item Response Theory. New York, USA: Oxford University Press; 2010.  
366

367 **Tables**

368 **Table 1. IRT model item parameters for the 12-item scale.**

369

| Item                                  | Parameter |     |     |
|---------------------------------------|-----------|-----|-----|
| <b>Mood go up and down?</b>           | .21       | .28 | .39 |
| <b>Feelings easily hurt?</b>          | -0.13     | .60 | .39 |
| <b>Are you a worrier?</b>             | -0.13     | .85 | .44 |
| <b>Suffer from nerves?</b>            | .17       | .67 | .44 |
| <b>Feel miserable for no reason?</b>  | .29       | .97 | .35 |
| <b>Often feel fed-up?</b>             | .36       | .09 | .39 |
| <b>Tense or highly strung?</b>        | .23       | .05 | .43 |
| <b>Often feel lonely?</b>             | .41       | .47 | .46 |
| <b>An irritable person?</b>           | .95       | .34 | .41 |
| <b>A nervous person?</b>              | .03       | .85 | .43 |
| <b>Worry embarrassing experience?</b> | .15       | .45 | .47 |
| <b>Troubled feelings of guilt?</b>    | .86       | .54 | .47 |

370 *Notes:* Item names truncated for brevity, see text.  $\alpha$  Item difficulty,  $\beta$  Item discrimination, H

371 Loevinger Coefficient,  $p < .0001$  for all  $\beta$  values; Goodness of fit (root mean square error of

372 approximation) = 0.11

373 **Table 2. IRT model item parameters for the 7-item and 3-item scales.**

| Item                                 | 7-item scale parameters |             |      | 3-item scale parameters |         |      |
|--------------------------------------|-------------------------|-------------|------|-------------------------|---------|------|
|                                      | $\alpha$                | $\beta$     | H    | $\alpha$                | $\beta$ | H    |
| <b>Mood go up and down?</b>          | 0.20                    | <b>2.57</b> | 0.50 | 0.19                    | 3.40    | 0.57 |
| <b>Are you a worrier?</b>            | <b>-0.15</b>            | <b>1.57</b> | 0.51 | -                       | -       | -    |
| <b>Suffer from nerves?</b>           | 1.16                    | 1.70        | 0.47 | -                       | -       | -    |
| <b>Feel miserable for no reason?</b> | 0.27                    | 2.16        | 0.47 | 0.26                    | 2.77    | 0.54 |
| <b>Often feel fed-up?</b>            | 0.35                    | 2.20        | 0.47 | 0.33                    | 2.89    | 0.56 |
| <b>Tense or highly strung?</b>       | <b>1.25</b>             | 1.98        | 0.52 | -                       | -       | -    |
| <b>A nervous person?</b>             | 1.05                    | 1.80        | 0.49 | -                       | -       | -    |

374 *Notes:* Item names truncated for brevity, see text.  $\beta$  Item discrimination,  $\alpha$  Item difficulty, H

375 Loevinger Coefficient  $p < .0001$  for all  $\beta$  values; 7-item Goodness of fit (root mean square

376 error of approximation) = 0.17; 3-item Goodness of fit (root mean square error of

377 approximation) < 0.001.

378 **Figures**

379

**Fig 1. Item Characteristic Curves (ICC) and Item Information Function (IIF) graph for the 12-item scale.**

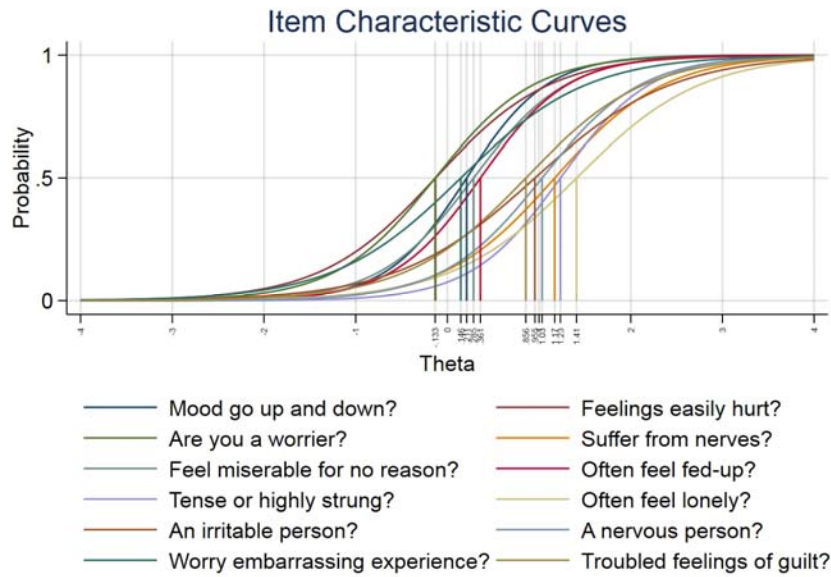

380

381

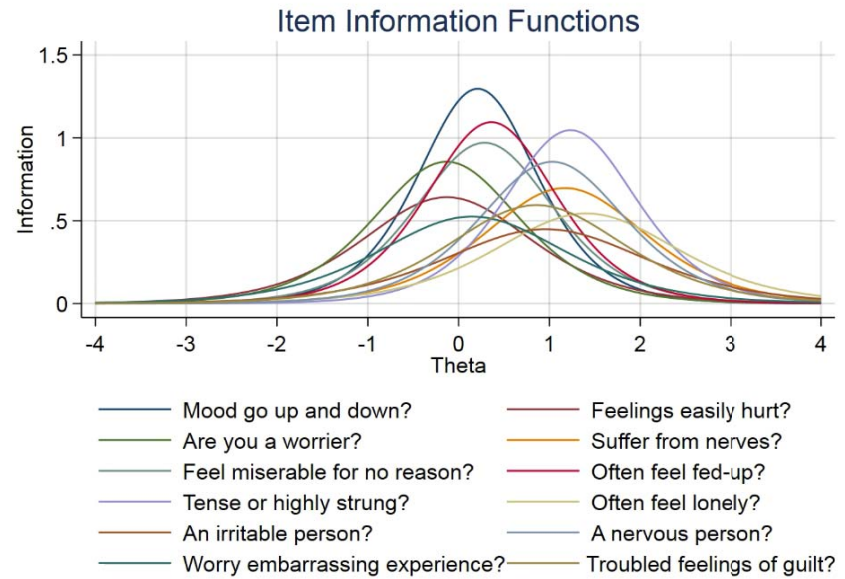

## 382 **Supporting information**

### 383 **Supporting methods**

384 For these binary response data, a 2-parameter logistic (2-PL) IRT model is  
385 appropriate:

$$386 \quad P(X_i = 1 | \theta, \beta_i, \alpha_i) = \frac{\exp(\alpha_i (\theta - \beta_i))}{1 + \exp(\alpha_i (\theta - \beta_i))} \quad (1)$$

387 The dependent variable is the dichotomous response (yes/no), the independent variables are  
388 the person's trait level, theta ( $\theta$ ) and item difficulty ( $\beta_i$ ). The independent variables combine  
389 accumulatively and the item's difficulty is subtracted from  $\theta$ . That is, the ratio of the  
390 probability of success for a person on an item to the probability of failure, where a logistic  
391 function provides the probability that endorsing any item ( $i$ ) is independent from the outcome  
392 of any other item, controlling for person parameters ( $\theta$ ), and item parameters. The 2-PL  
393 model includes two parameters to represent the item properties (difficulty and discrimination)  
394 in the exponential form of the logistic model. Previous research showed that a 2-PL IRT  
395 model was appropriate for Eysenck scales [28].

396 For each item, an item response function (IRF) may be calculated which calibrates the  
397 responses of an individual against each item. A calibrated standardised score for trait severity  
398  $\theta$  is returned and may be plotted as item characteristic curves (ICC) along a standardised  
399 scale with a mean of 0 (see Fig 1). From the ICC two parameters may be estimated. The first  
400 is the value of  $\theta$  at which the likelihood of item endorsement is 0.5, interpreted as 'expressed  
401 trait severity'. The second is the slope of the curve from the point at which the likelihood of  
402 item endorsement is 0.5, interpreted as 'expressed item discrimination' i.e., the ability to  
403 discriminate between greater and lesser severity scores. The IRF may also be expressed as an  
404 item information curve (IIF) which displays the relationship between severity and

405 discrimination (see Fig 1). The apex of the curve for any IIC indicates the value of  $\theta$  at which  
406 there is maximum discrimination. Statistical assumptions underlying the IRT principles of  
407 scalability, unidimensionality and item independence are examined.

## 408 **Supporting results**

### 409 **Statistical assumptions of the IRT analysis for the 12-item scale**

#### 410 **1. Item independence**

411 A correlation analysis assessed initial item independence and all items were  
412 significantly correlated ( $p < .0001$ ) but the majority of values were lower than 0.50,  
413 suggesting basic local item independence. A residual coefficient matrix, requested after  
414 estimation of a single-factor model showed that no residuals were too highly correlated,  $R <$   
415 0.20 [29], suggesting basic item independence.

#### 416 **2. Monotonicity**

417 A Mokken analysis produced a Loevinger H coefficient [30] which measures the  
418 scalable quality of items, expressed as a probability measure, independent of a respondent's  
419  $\theta$ . These coefficients ranged between 0.35 and 0.47, suggesting a weak ( $H = 0.3-0.4$ ) to  
420 moderate ( $H = 0.4-0.5$ ) monotonicity, no items reached strong scalability ( $H \geq 0.5$ ) [30].

#### 421 **3. Unidimensionality**

422 A single-factor CFA model was used to test for unidimensionality of the 12-item  
423 EPQ-N scale. The single-factor model had poor model fit:  $\text{Chi}^2 = 241797.89$ ,  $p < 0.0001$ ,  
424 Root Mean Square Error of approximation (RMSEA) = 0.11, Comparative Fit Index (CFI) =  
425 0.81, Tucker-Lewis Index (TLI) = 0.76, thereby indicating that the scale did not fulfill strict  
426 criteria for unidimensionality. Since IRT is relatively robust to violations against the  
427 assumption of unidimensionality [31, 32], the violation of unidimensionality is not a major  
428 concern when estimating item characteristics from IRT in the following. A post-IRT

429 estimation model measure of unidimensionality was also computed using a semi-partial  
430 correlation controlling for  $\Theta$ . This analysis provides individual item variance contribution  
431 after adjusting for all the other variables including  $\Theta$ . It demonstrates the relationship  
432 between local independence and unidimensionality, reflecting a conservative assessment  
433 whereby the desired  $R^2$  should ideally be zero or as close to zero as possible [33]. Items  
434 ranged between 0.01 and 0.02, suggesting unidimensionality. To our knowledge, there is still  
435 no standardised cut-off criterium for assessing this value (i.e., how close to zero all items  
436 should be across a scale).

### 437 **Statistical assumptions of the IRT analysis for the 7-item scale**

438 Statistical assumptions were computed on the revised scale of 7 items and importantly  
439 a Mokken analysis suggests improved scalability (monotonicity) compared to the full 12-item  
440 scale with three items reaching values  $\geq 0.50$ . Acceptable metrics for unidimensionality and  
441 item independence were achieved for this revised scale. A single-factor CFA model showed  
442 that the 7-item scale did not fulfill strict criteria for unidimensionality:  $\text{Chi}^2 = 153492.42$ ,  $p <$   
443  $0.0001$ ,  $\text{RMSEA} = 0.17$ ,  $\text{CFI} = 0.79$ ,  $\text{TLI} = 0.68$ .

### 444 **Statistical assumptions of the IRT analysis for the 3-item scale**

445 A Mokken analysis suggests that scalability is strong ( $H \geq 0.50$ ) across all items. A  
446 single-factor CFA model showed that the 3-item scale was unidimensional:  $\text{Chi}^2 = 0$ ,  $p = 1$ ,  
447  $\text{RMSEA} = 0$ ,  $\text{CFI} = 1$ ,  $\text{TLI} = 1$ . In a semi-partial correlation analysis controlling for  $\Theta$ , item  
448  $R^2$  ranged between 0.09 and 0.13, suggesting basic local independence and  
449 unidimensionality.

450

## 451 **Reliability of the scales**

### 452 **Reliability of the 12-item scale**

453 In IRT, reliability may be calculated at multiple point values of  $\Theta$  along the  
454 continuum rather than a single reliability score as in CTT. Reliability is defined at different  
455 points of  $\Theta$  with the mean of  $\Theta$  fixed at 0 and the variance at 1, facilitating identification of  
456 the model and reliability for all points along the  $\Theta$  continuum, distinguishing respondents  
457 according to specific values of  $\Theta$  [29]. For the 12-item scale, there is reliable information to  
458 differentiate respondents who possess no or just above an average amount of trait information  
459 ( $\Theta=0$ ; 0.87 and  $\Theta=1$ ; 0.88), considered very good for reliability. However, reliability then  
460 decreases ( $\Theta=2$ ; 0.76 and  $\Theta=-1$ ; 0.71) suggesting that the highest reliability of measuring the  
461 neurotic trait is at normal or a minimal amount of neuroticism,  $\Theta=0$  or 1. Thereafter,  
462 reliability reduces so that the extreme end of the continuum,  $\Theta=3$ ; 4; -2; -3; -4, is no longer  
463 reliably measured (S1 Table).

464

465 **S1 Table. Reliability for values of  $\Theta$  from the 2-PL IRT model fit for the 12-item, 7-item**  
466 **and 3-item scales.**

467

### 468 **Reliability of the revised scales**

469 Reliability across the revised 7-item scale is marginally improved compared to the full  
470 scale suggesting redundancy of the removed items (S1 Table). Reliability across the revised  
471 3-item is only good at  $\Theta = 0$  suggesting this scale is only reliable to measure those with an  
472 average trait (S1 Table).



473 **Supporting tables**

474 **S1 Table. Reliability for values of  $\Theta$  from the 2-PL IRT model fit for the 12-item, 7-item**  
475 **and 3-item scales.**

| $\Theta$  | 12-item scale |        |             | 7-item scale |        |             | 3-item scale |        |             |
|-----------|---------------|--------|-------------|--------------|--------|-------------|--------------|--------|-------------|
|           | TIF           | TIF SE | Reliability | TIF          | TIF SE | Reliability | TIF          | TIF SE | Reliability |
| <b>-4</b> | 1.02          | 0.99   | 0.02        | 1.01         | 1.00   | 0.01        | 1.00         | 1.00   | 0.00        |
| <b>-3</b> | 1.10          | 0.95   | 0.09        | 1.04         | 0.98   | 0.04        | 1.00         | 1.00   | 0.00        |
| <b>-2</b> | 1.52          | 0.81   | 0.34        | 1.24         | 0.90   | 0.19        | 1.03         | 0.98   | 0.03        |
| <b>-1</b> | 3.43          | 0.54   | 0.71        | 2.36         | 0.65   | 0.58        | 1.59         | 0.79   | 0.37        |
| <b>0</b>  | 7.96          | 0.35   | 0.87        | 6.22         | 0.40   | 0.84        | 6.96         | 0.38   | 0.86        |
| <b>1</b>  | 8.04          | 0.35   | 0.88        | 5.82         | 0.41   | 0.83        | 3.34         | 0.55   | 0.70        |
| <b>2</b>  | 4.11          | 0.49   | 0.76        | 2.84         | 0.59   | 0.65        | 1.15         | 0.93   | 0.13        |
| <b>3</b>  | 1.77          | 0.75   | 0.44        | 1.37         | 0.85   | 0.27        | 1.01         | 1.00   | 0.01        |
| <b>4</b>  | 1.16          | 0.93   | 0.14        | 1.06         | 0.97   | 0.06        | 1.00         | 1.00   | 0.00        |

476

477

*Note:* TIF = Test Information Function; SE = standard error.

478

479 **Supporting figures**480 **S1 Fig. Item Characteristic Curve (ICC) and Item Information Function (IIF) graph for the 7-item scale.**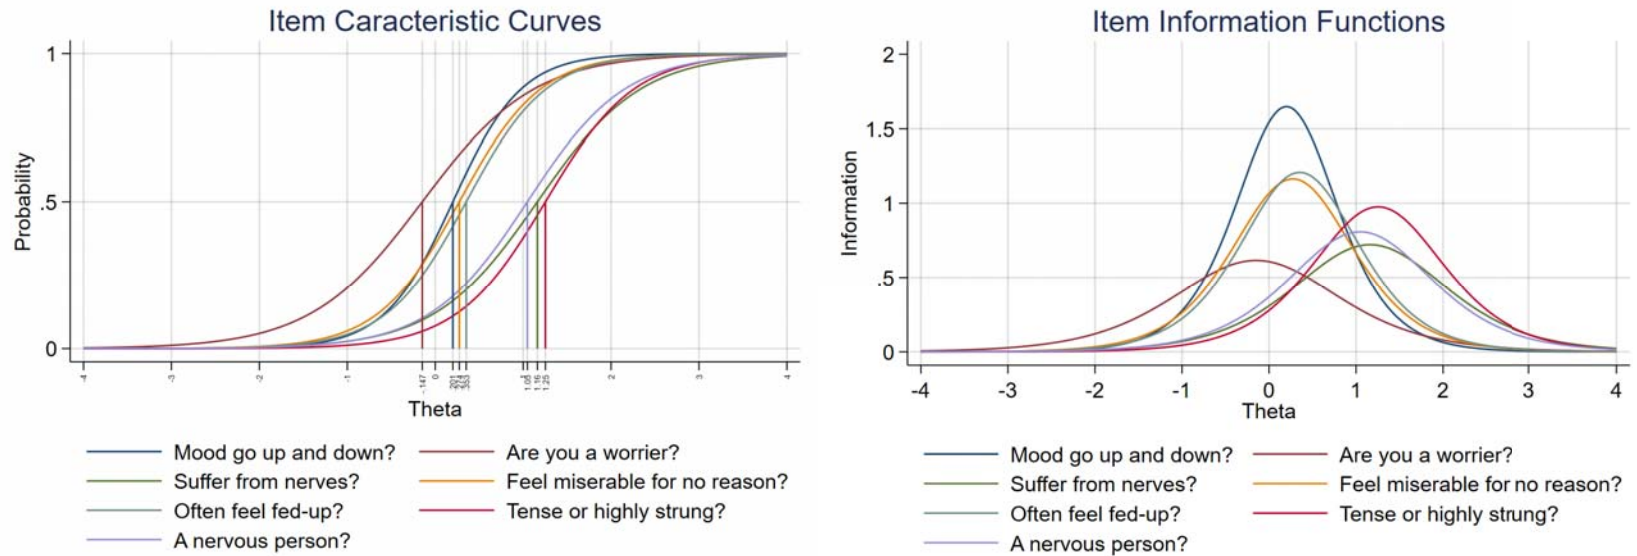

481

482

483

**S2 Fig. Item Characteristic Curves (ICC) and Item Information Function (IIF) graph for the 3-item scale.**

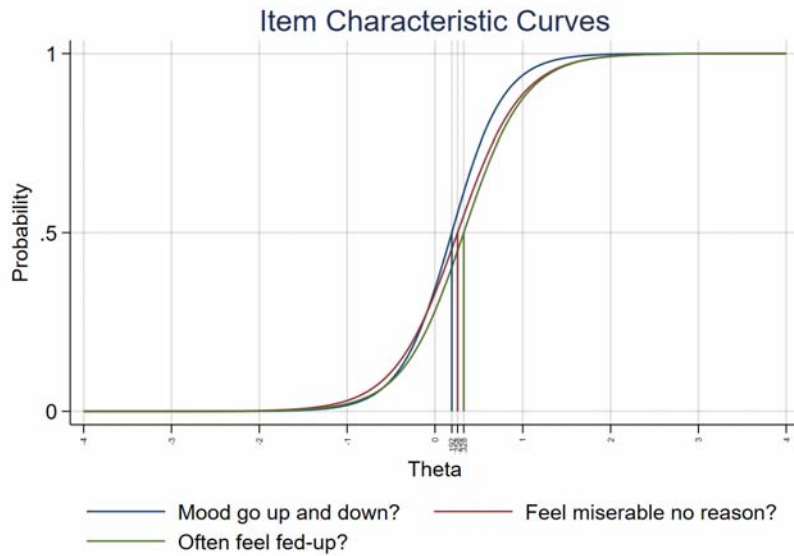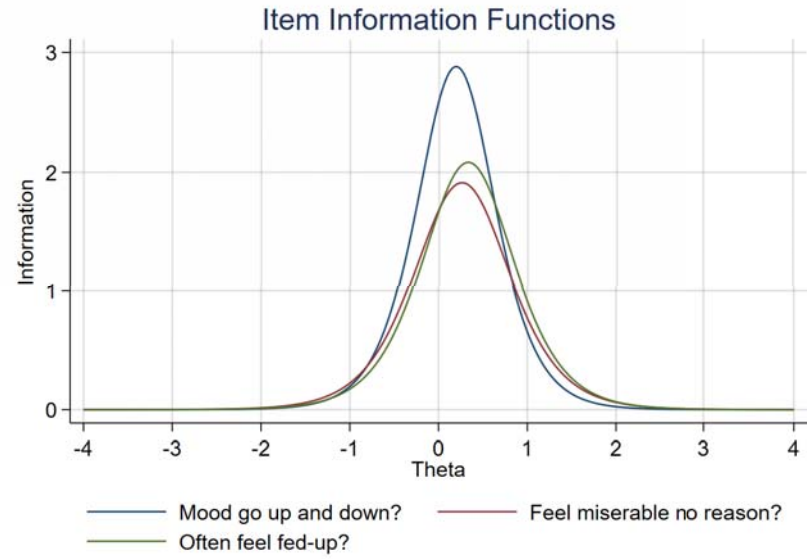

484
